# Supplementary material for: Efficient continuous-flow synthesis of long-chain alkylated naphthalene catalyzed by ionic liquids in a microreaction system
Source: Royal Society of Chemistry journal article supplement (doi:10.1039/d1re00223f), 2021-01-01
Supplement: d1re00223f1.pdf [file d1re00223f1.pdf]

## Supporting Information

### **Efficient continuous-flow synthesis of long-chain alkylated naphthalene catalyzed by ionic liquids in a microreaction system**

**Tian Yang<sup>1#</sup>, Fajun Wang<sup>1#</sup>, Jinpei Huang<sup>2\*</sup>, Si Da Ling<sup>1</sup>; Suli Liu<sup>3</sup>, Angui Zhang<sup>3</sup>, Yundong Wang<sup>1</sup>,  
Jianhong Xu<sup>1\*</sup>**

<sup>1</sup> The State Key Laboratory of Chemical Engineering, Department of Chemical Engineering, Tsinghua University, Beijing 100084, P.R. China

<sup>2</sup> College of life science, China Jiliang University, Hangzhou, Zhejiang 310018, P.R. China

<sup>3</sup> Ningxia Coal Industry Group Co. Ltd., CHN ENERGY, Yinchuan 750011, P.R. China

## Table of Contents

|                               |    |
|-------------------------------|----|
| 1. Supplementary Figures..... | S3 |
| 2. Supplementary Tables.....  | S7 |

## 1. Supplementary Figures

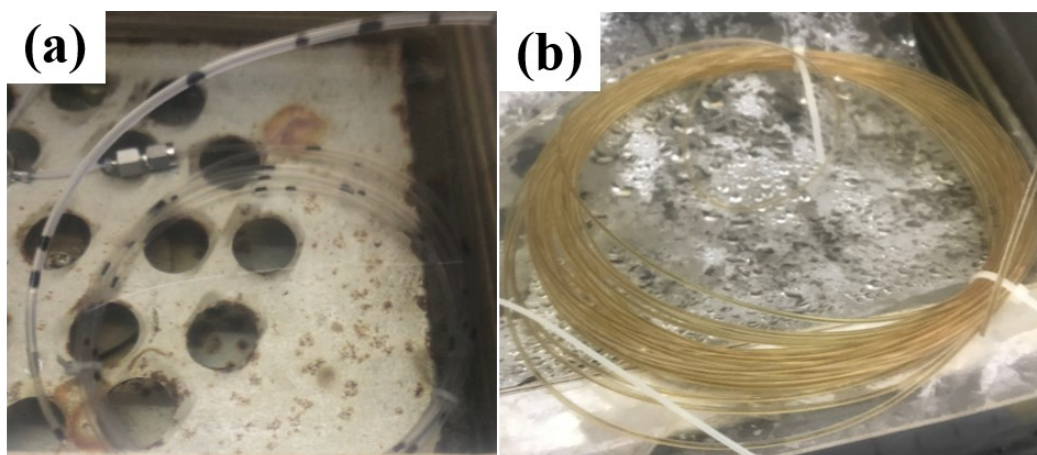

**Figure S1.** Influence of the delay loop's inner diameter on the dispersion of two phases  
(a) 2 mm inner diameter; (b) 0.9 mm inner diameter

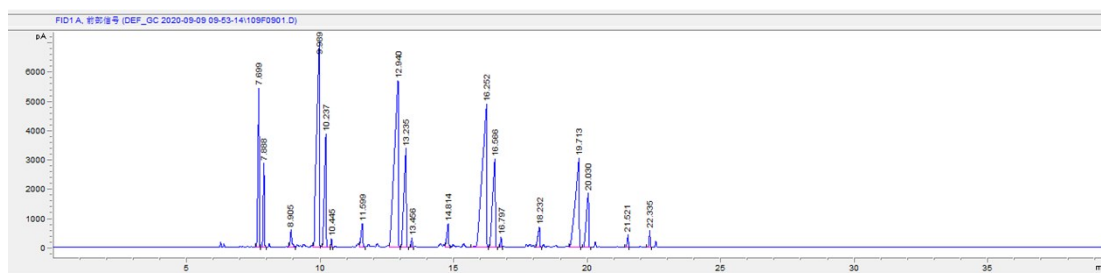

**Figure S2.** GC profiles for the 1-dodecene alkylation products

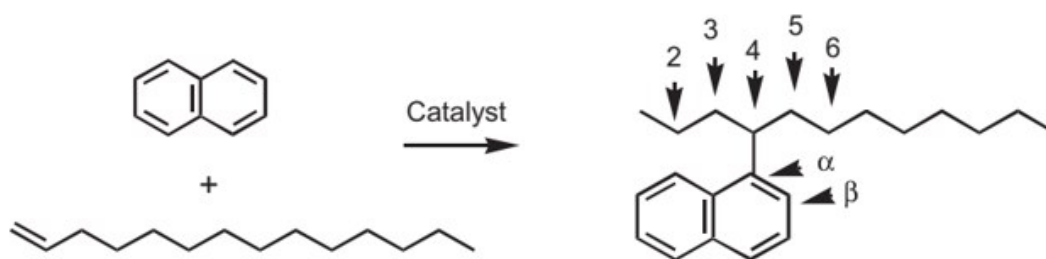

**Figure S3.** Alkylation reaction between 1-dodecene and naphthalene

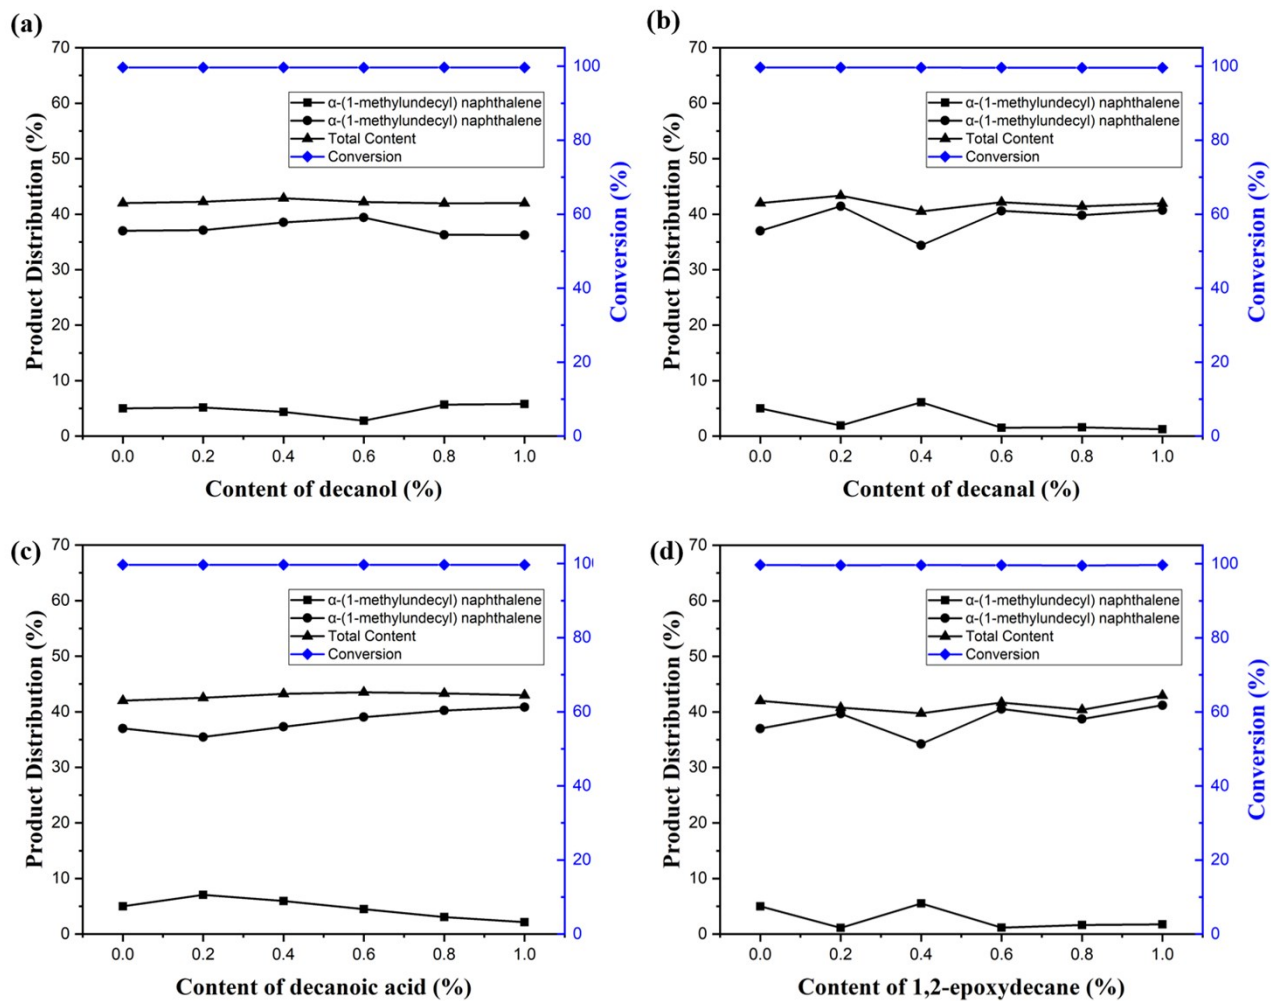

Figure S4. Effects of the content of each kind of oxides on the on the alkylation of 1-dodecene

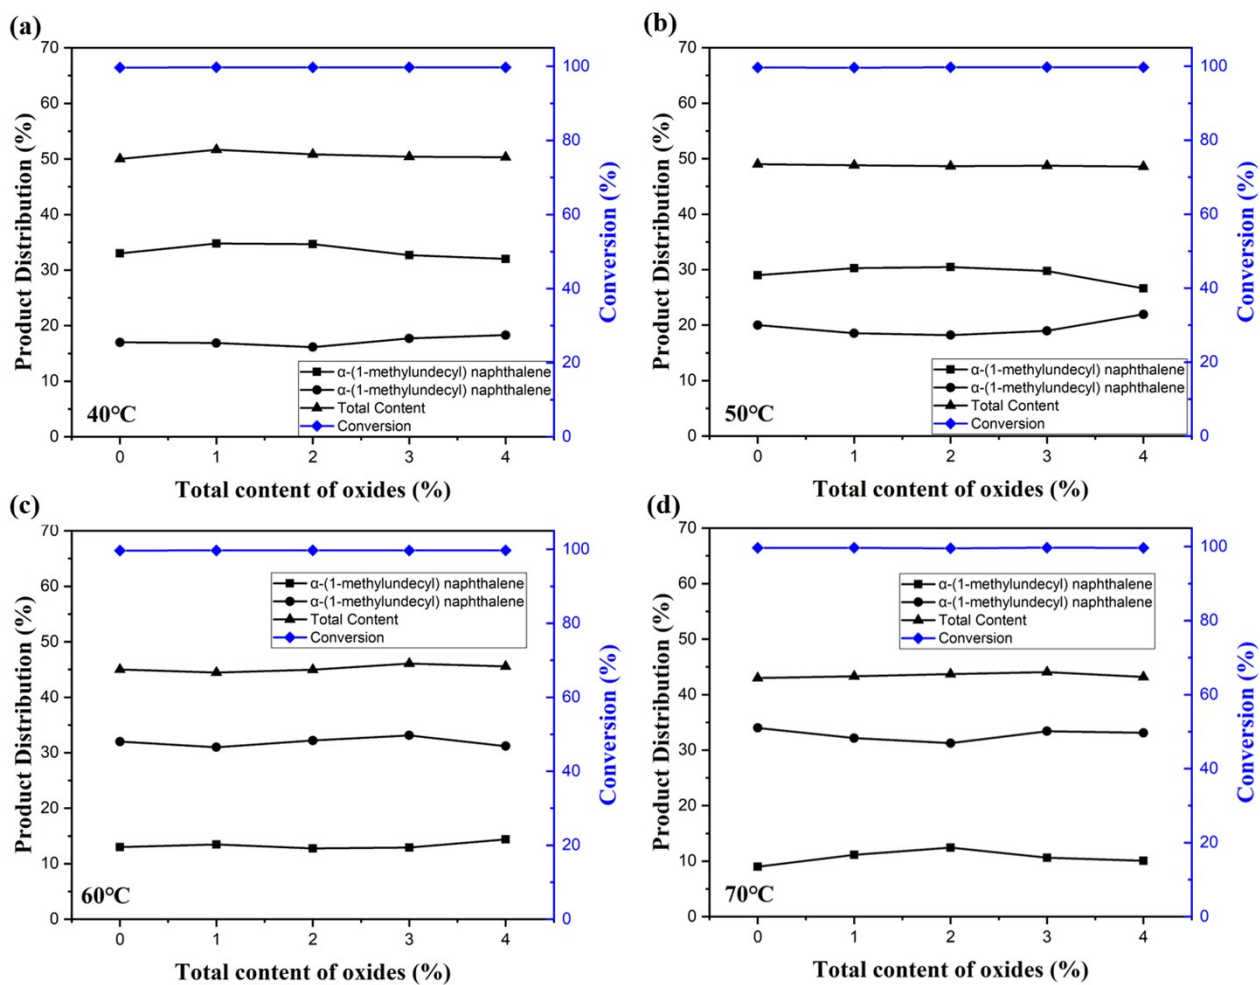

Figure S5. Effects of the total content of oxides on the alkylation of 1-dodecene

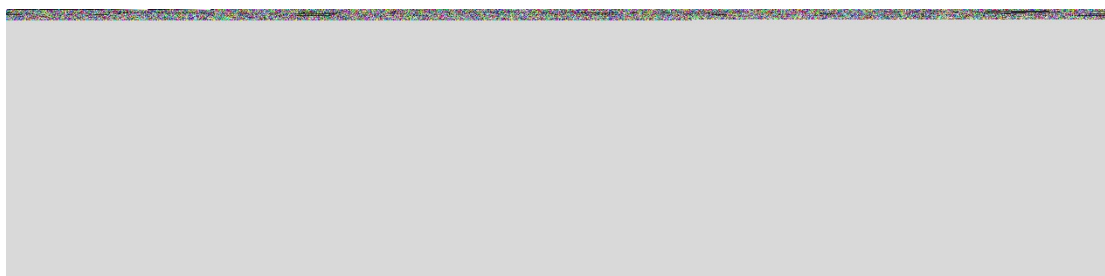

Figure S6. GC profiles for the C9~C13 olefins

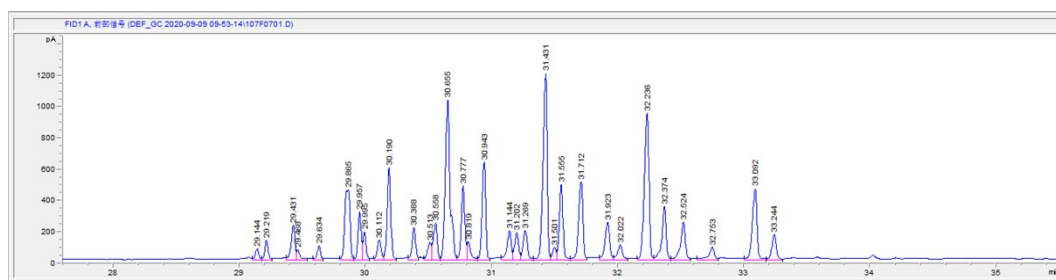

Figure S7. GC profiles for the C9~C13 olefins alkylation products

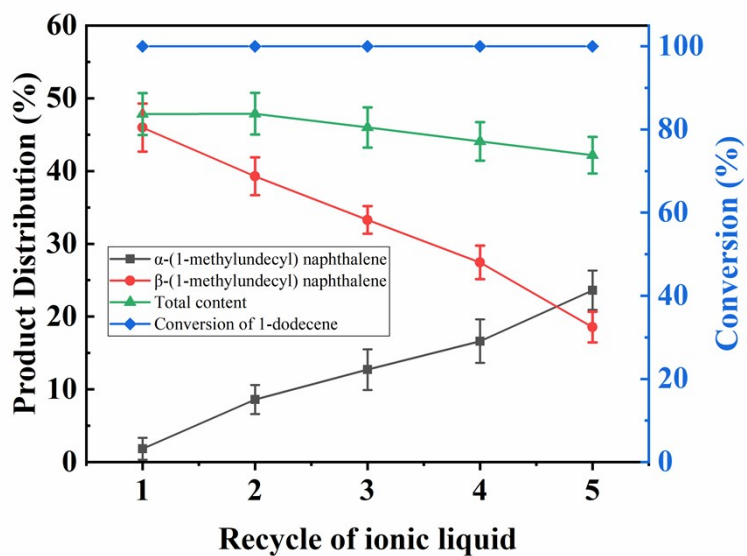

Figure S8. Influence of ionic liquid recycling on the distribution of products

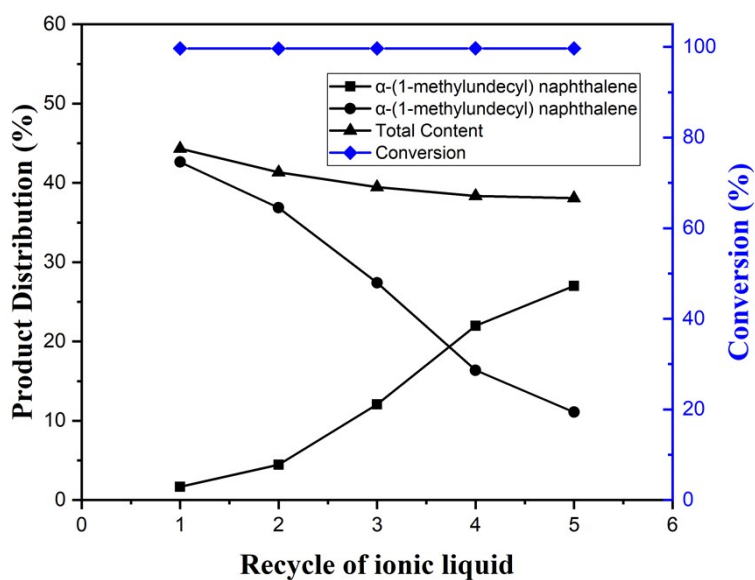

Figure S9. Reuse of ionic liquids at 4% oxides content in 1-dodecene

The flow rates of naphthalene and 1-dodecene were 9 mL/min and 1 mL/min, respectively; the temperature was 70°C; the molar ratio of naphthalene to 1-dodecene was 6:1; the flow rate of ionic liquid was 0.3 mL/min

## 2. Supplementary Tables

**Table S1.** Composition of products for the alkylation of 1-dodecene and naphthalene

| Peak | Retention time /min | Products                                                                       | Molecular formula               |
|------|---------------------|--------------------------------------------------------------------------------|---------------------------------|
| 1    | 31.186              | $\alpha$ - (1-pentylheptyl) naphthalene                                        | C <sub>22</sub> H <sub>32</sub> |
| 2    | 31.251              | $\alpha$ - (1-butylloctyl) naphthalene                                         | C <sub>22</sub> H <sub>32</sub> |
| 3    | 31.417              | $\alpha$ - (1-propylnonyl) naphthalene                                         | C <sub>22</sub> H <sub>32</sub> |
| 4    | 31.485              | $\beta$ -(1-pentylheptyl) naphthalene                                          | C <sub>22</sub> H <sub>32</sub> |
| 5    | 31.540              | $\beta$ -(1-butyl-octyl) naphthalene                                           | C <sub>22</sub> H <sub>32</sub> |
| 6    | 31.704              | $\alpha$ - (1-ethyldecyl) naphthalene<br>$\beta$ - (1-propylnonyl) naphthalene | C <sub>22</sub> H <sub>32</sub> |
| 7    | 31.917              | $\beta$ - (1-ethyldecyl) naphthalene                                           | C <sub>22</sub> H <sub>32</sub> |
| 8    | 32.237              | $\alpha$ - (1-methylundecyl) naphthalene                                       | C <sub>22</sub> H <sub>32</sub> |
| 9    | 32.382              | $\beta$ - (1-methylundecyl) naphthalene                                        | C <sub>22</sub> H <sub>32</sub> |

**Table S2.** Retention time of GC-MS for C9~C13 olefines

| Peaks | Retention time /min | Components  | Molecular formula               |
|-------|---------------------|-------------|---------------------------------|
| 1     | 7.699               | 1-nonene    | C <sub>9</sub> H <sub>18</sub>  |
| 2     | 7.888               | nonane      | C <sub>9</sub> H <sub>20</sub>  |
| 3     | 9.986               | 1-decene    | C <sub>10</sub> H <sub>20</sub> |
| 4     | 10.237              | decane      | C <sub>10</sub> H <sub>22</sub> |
| 5     | 12.937              | 1- undecene | C <sub>11</sub> H <sub>22</sub> |
| 6     | 13.235              | undecane    | C <sub>11</sub> H <sub>24</sub> |
| 7     | 16.264              | 1-dodecene  | C <sub>12</sub> H <sub>24</sub> |
| 8     | 16.579              | dodecane    | C <sub>12</sub> H <sub>26</sub> |
| 9     | 19.716              | 1-tridecene | C <sub>13</sub> H <sub>26</sub> |
| 10    | 20.032              | tridecane   | C <sub>13</sub> H <sub>28</sub> |

**Table S3.** Composition of C9~C13 olefines after normalization

| Components                   | Olefine |       |       |       |       | Alkane |      |      |      |      |
|------------------------------|---------|-------|-------|-------|-------|--------|------|------|------|------|
|                              | C9      | C10   | C11   | C12   | C13   | C9     | C10  | C11  | C12  | C13  |
| Concentration<br>$X_i$ (wt%) | 6.02    | 17.80 | 19.73 | 19.14 | 10.55 | 2.70   | 6.11 | 6.99 | 7.27 | 3.68 |
| $\sum X_i$                   | 73.24   |       |       |       |       | 26.76  |      |      |      |      |

**Table S4.** Productivity of alkylated naphthalene for the alkylation of C9~C13 olefines

| Item                                                                          | Value                        | Unit    |
|-------------------------------------------------------------------------------|------------------------------|---------|
| Density of naphthalene (20 wt.% with cyclohexane)                             | 0.80                         | g/mL    |
| Density of C9~C13 $\alpha$ -olefines                                          | 0.75                         | g/mL    |
| Mass fraction of $\alpha$ -olefines in C9~C13 $\alpha$ -olefines              | 0.73                         | 1       |
| The average molecular weight of $\alpha$ -olefin in C9~C13 $\alpha$ -olefines | 153                          | g/mol   |
| The average molecular weight of alkylated naphthalene                         | 281                          | g/mol   |
| Volume flow rate of C9~C13 $\alpha$ -olefines                                 | 0.7                          | ml/min  |
| Conversion rate of $\alpha$ -olefines                                         | 0.99                         | 1       |
| Mole flow rate of $\alpha$ -olefines in C9~C13 $\alpha$ -olefines             | $0.7*0.75*0.73/153=0.002505$ | mol/min |
| Mass flow rate of alkylated naphthalene                                       | $0.002505*0.99*281=0.697$    | g/min   |

**Table S5.** The proportion of catalytic substance taken away by organic phase

| Item                                                | 1-dodecene  | C9~C13 olefines |
|-----------------------------------------------------|-------------|-----------------|
| Sample mass                                         | 20.92 g     | 22.56 g         |
| Mass of wash water                                  | 101.45 g    | 98.68 g         |
| The concentration of Al <sup>3+</sup> in wash water | 42.823 mg/L | 169.266 mg/L    |
| Al taken away by organic phase                      | 4.344 mg    | 16.703 mg       |
| The initial mass of ionic liquid                    | 1.0137 g    | 1.0217 g        |
| Al contained in ionic liquid                        | 151.101 mg  | 152.286 mg      |
| The proportion of Al taken away by organic phase    | 2.875%      | 10.968%         |
